# Supplementary material for: New lead-iodide formates with a strong second-harmonic generation response and suitable birefringence obtained by the substitution strategy
Source: Royal Society of Chemistry journal article supplement (doi:10.1039/d2sc05216d), 2022-11-15
Supplement: d2sc05216d1.pdf [file d2sc05216d1.pdf]

## Tables of Contents

|                          |    |
|--------------------------|----|
| Tables of Contents ..... | 1  |
| Tables and Figures ..... | 2  |
| References.....          | 10 |

## Tables and Figures

**Table S1.** Crystal data and structure refinements for  $K_2[PbI_2(HCOO)_2]$ .

| Empirical formula                                                 | $K_2[PbI_2(HCOO)_2]$                                     | $Rb_2[PbI_2(HCOO)_2]$                                    |
|-------------------------------------------------------------------|----------------------------------------------------------|----------------------------------------------------------|
| Formula weight                                                    | 629.23                                                   | 721.97                                                   |
| Temperature(K)                                                    | 293.15                                                   | 293.15                                                   |
| Crystal color                                                     | Light yellow                                             | Colorless                                                |
| Wavelength(Å)                                                     | 1.3405                                                   | 1.3405                                                   |
| Crystal system                                                    | Orthorhombic                                             | Orthorhombic                                             |
| Space group                                                       | <i>Amm2</i>                                              | <i>Amm2</i>                                              |
| a/Å                                                               | 5.80240(10)                                              | 6.06620(10)                                              |
| b/Å                                                               | 6.7740(2)                                                | 6.79460(10)                                              |
| c/Å                                                               | 13.6260(4)                                               | 13.7817(3)                                               |
| Volume / Å <sup>3</sup>                                           | 535.58(2)                                                | 568.046(18)                                              |
| Z, $\rho_{\text{calcd}} / \text{g}\cdot\text{cm}^{-3}$            | 2, 3.902                                                 | 2, 4.221                                                 |
| $\mu / \text{mm}^{-1}$                                            | 56.272                                                   | 55.500                                                   |
| F (000)                                                           | 544                                                      | 616                                                      |
| Data / restraints / parameters                                    | 473/1/37                                                 | 571/1/37                                                 |
| 2 $\theta$ range for data collection/ <sup>o</sup>                | 11.292 to 104.072                                        | 11.164 to 103.856                                        |
| Limiting indices                                                  | $-6 \leq h \leq 6, -7 \leq k \leq 7, -15 \leq l \leq 16$ | $-7 \leq h \leq 7, -7 \leq k \leq 7, -16 \leq l \leq 16$ |
| Reflections collected / unique                                    | 2119/ 473 [R <sub>int</sub> = 0.0373]                    | 2207/571 [R <sub>int</sub> = 0.0369]                     |
| Completeness                                                      | 100%                                                     | 100%                                                     |
| Goodness-of-fit on F <sup>2</sup>                                 | 1.088                                                    | 1.128                                                    |
| R <sub>1</sub> , wR <sub>2</sub> (I > 2 $\sigma$ ) <sup>[a]</sup> | R <sub>1</sub> = 0.0193, wR <sub>2</sub> = 0.0465        | R <sub>1</sub> = 0.0185, wR <sub>2</sub> = 0.0421        |
| R <sub>1</sub> , wR <sub>2</sub> (all data)                       | R <sub>1</sub> = 0.0193, wR <sub>2</sub> = 0.0465        | R <sub>1</sub> = 0.0186, wR <sub>2</sub> = 0.0421        |
| Largest diff. peak and hole/ e <sup>-</sup> ·Å <sup>-3</sup>      | 1.11 and -0.67                                           | 0.62 and -0.41                                           |
| Flack parameter                                                   | 0.03(2)                                                  | 0.018(11)                                                |

$$^{[a]}R_1 = \Sigma||F_o| - |F_c||/\Sigma|F_o| \text{ and } wR_2 = [\Sigma w(F_o^2 - F_c^2)^2 / \Sigma w F_o^4]^{1/2}.$$

**Table S2.** Atomic coordinates and equivalent isotropic displacement parameters (Å<sup>2</sup>) of  $K_2[PbI_2(HCOO)_2]$ .

| Atomic parameters |       |     |            |             |                              |                  |
|-------------------|-------|-----|------------|-------------|------------------------------|------------------|
| Atom              | Wyck. | x   | y          | z           | U <sub>eq</sub> <sup>a</sup> | BVS <sup>b</sup> |
| Pb1               | 2b    | 0.5 | 0.5        | 0.56422(2)  | 0.0308(3)                    | 1.59             |
| K1                | 2a    | 0   | 0.5        | 0.3166(4)   | 0.0364(10)                   | 0.97             |
| K2                | 2a    | 0   | 0          | 0.4962(6)   | 0.0406(13)                   | 1.29             |
| I1                | 2a    | 0   | 0.5        | 0.68219(14) | 0.0452(7)                    | -0.68            |
| I2                | 2b    | 0.5 | 0          | 0.65397(10) | 0.032(4)                     | -0.94            |
| O1                | 8f    | 1   | 0.3093(12) | 0.2818(10)  | 0.0375(15)                   | -2.23            |
| C1                | 4e    | 0.5 | 0.2392(18) | 0.3928(9)   | 0.031(3)                     |                  |

  

| Anisotropic displacement parameters (Å <sup>2</sup> ) |                 |                 |                 |                 |                 |                 |
|-------------------------------------------------------|-----------------|-----------------|-----------------|-----------------|-----------------|-----------------|
| Atom                                                  | U <sub>11</sub> | U <sub>22</sub> | U <sub>33</sub> | U <sub>23</sub> | U <sub>13</sub> | U <sub>12</sub> |
| Pb1                                                   | 24.1(4)         | 38.9(5)         | 29.5(6)         | 0               | 0               | 0               |
| K1                                                    | 25(2)           | 44(3)           | 40(2)           | 0               | 0               | 0               |
| K2                                                    | 26(2)           | 35(2)           | 61(4)           | 0               | 0               | 0               |
| I1                                                    | 24.0(8)         | 51.6(10)        | 60.1(17)        | 0               | 0               | 0               |
| I2                                                    | 29.9(7)         | 35.6(8)         | 30.4(10)        | 0               | 0               | 0               |
| O1                                                    | 28(3)           | 43(4)           | 42(4)           | 6(4)            | -2(3)           | 0(3)            |
| C1                                                    | 40(8)           | 22(7)           | 31(9)           | 3(5)            | 0               | 0               |

**Table S3.** Atomic coordinates and equivalent isotropic displacement parameters ( $\text{\AA}^2$ ) of  $\text{Rb}_2[\text{PbI}_2(\text{HCOO})_2]$ .

| Atomic parameters |       |            |            |             |                   |                  |
|-------------------|-------|------------|------------|-------------|-------------------|------------------|
| Atom              | Wyck. | x          | y          | z           | $U_{\text{eq}}^a$ | BVS <sup>b</sup> |
| Pb1               | 2b    | 0.5        | 0.5        | 0.42812(3)  | 0.0302(3)         | 1.56             |
| Rb1               | 2a    | 1          | 1          | 0.48777(18) | 0.0366(5)         | 1.62             |
| Rb2               | 2a    | 1          | 0.5        | 0.67764(16) | 0.0346(5)         | 1.55             |
| I1                | 2b    | 1.5        | 1          | 0.33536(8)  | 0.0305(3)         | -1.51            |
| I2                | 2a    | 0          | 0.5        | 0.32236(12) | 0.0429(4)         | -0.74            |
| O1                | 8f    | 0.6816(11) | 0.7179(9)  | 0.5605(6)   | 0.0386(15)        | -2.48            |
| C1                | 4e    | 0.5        | 0.7605(19) | 0.5969(9)   | 0.033(4)          |                  |

  

| Anisotropic displacement parameters ( $\text{\AA}^2$ ) |          |          |          |          |          |          |
|--------------------------------------------------------|----------|----------|----------|----------|----------|----------|
| Atom                                                   | $U_{11}$ | $U_{22}$ | $U_{33}$ | $U_{23}$ | $U_{13}$ | $U_{12}$ |
| Pb1                                                    | 25.3(4)  | 37.5(5)  | 27.9(5)  | 0        | 0        | 0        |
| Rb1                                                    | 24.1(10) | 35.7(11) | 49.9(14) | 0        | 0        | 0        |
| Rb2                                                    | 23.9(10) | 45(11)   | 34.7(10) | 0        | 0        | 0        |
| I1                                                     | 24.2(7)  | 39.2(8)  | 28(7)    | 0        | 0        | 0        |
| I2                                                     | 25.8(8)  | 40(9)    | 62.8(11) | 0        | 0        | 0        |
| O1                                                     | 25(3)    | 46(4)    | 44(4)    | 7(4)     | -3(4)    | -2(3)    |
| C1                                                     | 48(10)   | 18(8)    | 34(7)    | 6(5)     | 0        | 0        |

**Table S4.** Selected bond length ( $\text{\AA}$ ) and angles (deg.) for  $\text{K}_2[\text{PbI}_2(\text{HCOO})_2]$ .

|                                      |            |                                      |            |
|--------------------------------------|------------|--------------------------------------|------------|
| Pb1-I1                               | 3.3168(9)  | Pb1-O1 <sup>2</sup>                  | 2.605(8)   |
| Pb1-I1 <sup>1</sup>                  | 3.3168(9)  | Pb1-O1 <sup>3</sup>                  | 2.605(8)   |
| Pb1-O1                               | 2.605(8)   | Pb1-O1 <sup>4</sup>                  | 2.605(8)   |
| I1-Pb1-I1 <sup>1</sup>               | 122.02(6)  | I1 <sup>1</sup> -Pb1-O1 <sup>4</sup> | 135.52(15) |
| I1-Pb1-O1                            | 88.29(16)  | O1-Pb1-O1 <sup>2</sup>               | 90.3(3)    |
| I1-Pb1-O1 <sup>2</sup>               | 88.29(16)  | O1-Pb1-O1 <sup>3</sup>               | 50.3(3)    |
| I1-Pb1-O1 <sup>3</sup>               | 135.52(15) | O1-Pb1-O1 <sup>4</sup>               | 69.1(3)    |
| I1-Pb1-O1 <sup>4</sup>               | 88.29(16)  | O1 <sup>2</sup> -Pb1-O1 <sup>3</sup> | 69.1(3)    |
| I1 <sup>1</sup> -Pb1-O1              | 135.52(15) | O1 <sup>2</sup> -Pb1-O1 <sup>4</sup> | 50.3(3)    |
| I1 <sup>1</sup> -Pb1-O1 <sup>2</sup> | 135.52(15) | O1 <sup>3</sup> -Pb1-O1 <sup>4</sup> | 90.3(3)    |
| I1 <sup>1</sup> -Pb1-O1 <sup>3</sup> | 88.29(16)  |                                      |            |

Symmetry transformations used to generate equivalent atoms: <sup>1</sup> 1+x, y, z; <sup>2</sup> 1-x, 1-y, z; <sup>3</sup> 1-x, y, z; <sup>4</sup> x, 1-y, z**Table S5.** Selected bond length ( $\text{\AA}$ ) and angles (deg.) for  $\text{Rb}_2[\text{PbI}_2(\text{HCOO})_2]$ .

|                                      |            |                                      |           |
|--------------------------------------|------------|--------------------------------------|-----------|
| Pb1-I2                               | 3.3651(8)  | Pb1-O1 <sup>2</sup>                  | 2.595(7)  |
| Pb1-I2 <sup>1</sup>                  | 3.3652(8)  | Pb1-O1 <sup>3</sup>                  | 2.595(7)  |
| Pb1-O1                               | 2.595(7)   | Pb1-O1 <sup>4</sup>                  | 2.595(7)  |
| I2-Pb1-I2 <sup>1</sup>               | 128.67(5)  | I2 <sup>1</sup> -Pb1-O1 <sup>4</sup> | 85.53(16) |
| I2-Pb1-O1                            | 133.40(14) | O1-Pb1-O1 <sup>2</sup>               | 90.6(3)   |
| I2-Pb1-O1 <sup>2</sup>               | 85.53(16)  | O1-Pb1-O1 <sup>3</sup>               | 50.2(3)   |
| I2-Pb1-O1 <sup>3</sup>               | 85.53(16)  | O1-Pb1-O1 <sup>4</sup>               | 69.6(3)   |
| I2-Pb1-O1 <sup>4</sup>               | 133.40(14) | O1 <sup>2</sup> -Pb1-O1 <sup>3</sup> | 69.6(3)   |
| I2 <sup>1</sup> -Pb1-O1              | 85.53(16)  | O1 <sup>2</sup> -Pb1-O1 <sup>4</sup> | 50.2(3)   |
| I2 <sup>1</sup> -Pb1-O1 <sup>2</sup> | 133.40(14) | O1 <sup>3</sup> -Pb1-O1 <sup>4</sup> | 90.6(3)   |
| I2 <sup>1</sup> -Pb1-O1 <sup>3</sup> | 133.40(14) |                                      |           |

Symmetry transformations used to generate equivalent atoms: <sup>1</sup> 1+x, y, z; <sup>2</sup> 1-x, 1-y, z; <sup>3</sup> 1-x, y, z; <sup>4</sup> x, 1-y, z

**Table S6.** EDS and EA for  $K_2[PbI_2(HCOO)_2]$  and  $Rb_2[PbI_2(HCOO)_2]$ 

|                               | <b>Pb</b> | <b>I</b> | <b>K</b> | <b>Rb</b> | <b>C</b> | <b>H</b> |
|-------------------------------|-----------|----------|----------|-----------|----------|----------|
| $K_2[PbI_2(HCOO)_2]$          | 31.53%    | 40.33%   | 14.82%   | -         | 3.75%    | 0.39%    |
| $K_2[PbI_2(HCOO)_2]$ (Calc.)  | 32.93%    | 40.34%   | 12.43%   | -         | 3.81%    | 0.32%    |
| $Rb_2[PbI_2(HCOO)_2]$         | 28.70%    | 35.15%   | -        | 23.66%    | 3.38%    | 0.42%    |
| $Rb_2[PbI_2(HCOO)_2]$ (Calc.) | 29.88%    | 39.66%   | -        | 22.75%    | 3.33%    | 0.28%    |

**Table S7** SHG responses and decomposition temperature of formates.

| <b>Crystal Name</b>               | <b>Space Group</b> | <b>SHG response</b>                | <b>Decomposition Temperature<br/>(N<sub>2</sub> condition)</b> | <b>References</b> |
|-----------------------------------|--------------------|------------------------------------|----------------------------------------------------------------|-------------------|
| $Cd(HCOO)_2 \cdot 2CS(NH_2)_2$    | $P2_12_12_1$       | $2 \times KDP$                     | *                                                              | [1]               |
| N,N'-diphenylguanidinium formate  | $P2_1cn$           | $1.8 \times KDP$                   | 203 °C                                                         | [2]               |
| L-threonine formate               | $P4_1$             | $1.21 \times KDP$                  | *                                                              | [3]               |
| L-valine formate                  | *                  | $0.5 \times urea$                  | *                                                              | [4]               |
| $LiHCOO \cdot H_2O(LFM)$          | $Pbn2_1$           | $0.9 \times KDP$                   | 70 °C                                                          | [5]               |
| L-alanine formate                 | $P2_12_12_1$       | $0.75 \times KDP$                  | 234 °C                                                         | [6]               |
| $Li_{0.9}Na_{0.1}HCOO \cdot H_2O$ | $mm2$              | $0.8 \times LFM$                   | *                                                              | [7]               |
| $Sr(HCOO)_2 \cdot 2H_2O$          | $P2_12_12_1$       | $0.48 \times KDP$                  | 72 °C                                                          | [8]               |
| L-serine formate                  | $P2_1$             | $0.44 \times KDP$                  | *                                                              | [9]               |
| $Ba(HCOO)_2$                      | $P2_12_12_1$       | $d_{36} = 0.32 \times d_{36}(KDP)$ | *                                                              | [10]              |
| NaHCOO                            | $mm2$              | $0.2 \times LFM$                   | *                                                              | [7]               |
| $Y(HCOO)_3 \cdot 2H_2O$           | $P2_12_12_1$       | $0.1 \times KDP$                   | *                                                              | [11]              |
| $NH_4[Cu(HCOO)_3]$                | $P2_12_12_1$       | $0.08 \times KDP$                  | 82 °C                                                          | [12]              |
| $[NH_4][Cd(HCOO)_3]$              | $Pna2_1$           | $16 \times quarts$                 | 100 °C                                                         | [13]              |
| $KCs_2Pb_2(HCOO)_2Cl_5$           | $Amm2$             | $4.2 \times KDP$                   | 185 °C                                                         | [14]              |
| $KCs_2[Pb_2Br_5(HCOO)_2]$         | $Amm2$             | $6.5 \times KDP$                   | 165 °C                                                         | [15]              |
| $Rb_2[PbI_2(HCOO)_2]$             | $Amm2$             | $6.8 \times KDP$                   | 230 °C                                                         | <b>This work</b>  |
| $K_2[PbI_2(HCOO)_2]$              | $Amm2$             | $8 \times KDP$                     | 240 °C                                                         | <b>This work</b>  |

\* is not mentioned in the original articles.

**Table S8.** The local dipole moment ( $\mu$ ) in Debye for  $K_2[PbI_2(HCOO)_2]$  and  $Rb_2[PbI_2(HCOO)_2]$ .

|            | <b><math>K_2[PbI_2(HCOO)_2]</math></b> |         |         | <b><math>Rb_2[PbI_2(HCOO)_2]</math></b> |         |         |
|------------|----------------------------------------|---------|---------|-----------------------------------------|---------|---------|
|            | $\mu_x$                                | $\mu_y$ | $\mu_z$ | $\mu_x$                                 | $\mu_y$ | $\mu_z$ |
| $PbI_2O_4$ | 0                                      | 0       | 18.54   | 0                                       | 0       | -17.81  |
| $PbI_2O_4$ | 0                                      | 0       | 18.54   | 0                                       | 0       | -17.81  |
| HCOO       | 0                                      | 0.91    | -1.56   | 0                                       | 0.89    | 1.54    |
| HCOO       | 0                                      | 0.91    | -1.56   | 0                                       | 0.89    | 1.54    |
| HCOO       | 0                                      | -0.91   | -1.56   | 0                                       | -0.89   | 1.54    |
| HCOO       | 0                                      | -0.91   | -1.56   | 0                                       | -0.89   | 1.54    |
| Total      | 0                                      | 0       | 30.84   | 0                                       | 0       | -29.46  |

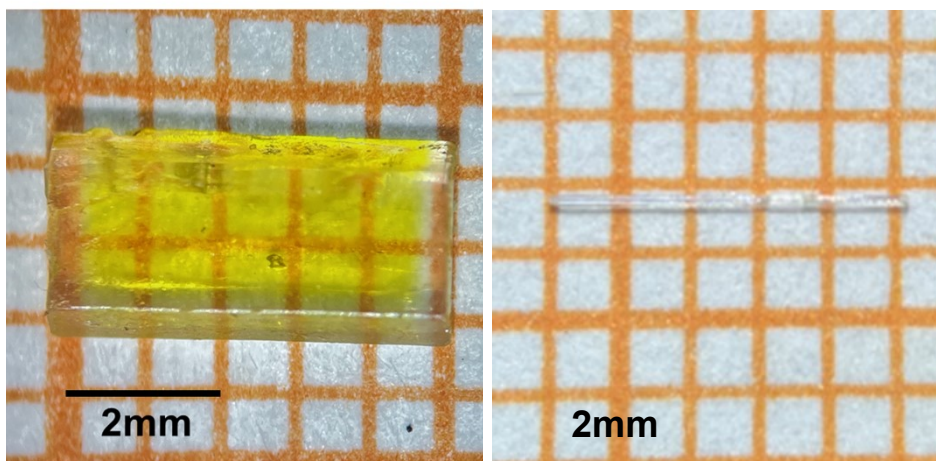

**Figure S1.** Photographs of the as-grown crystal without polishing for (a)  $\text{K}_2[\text{PbI}_2(\text{HCOO})_2]$  and (b)  $\text{Rb}_2[\text{PbI}_2(\text{HCOO})_2]$

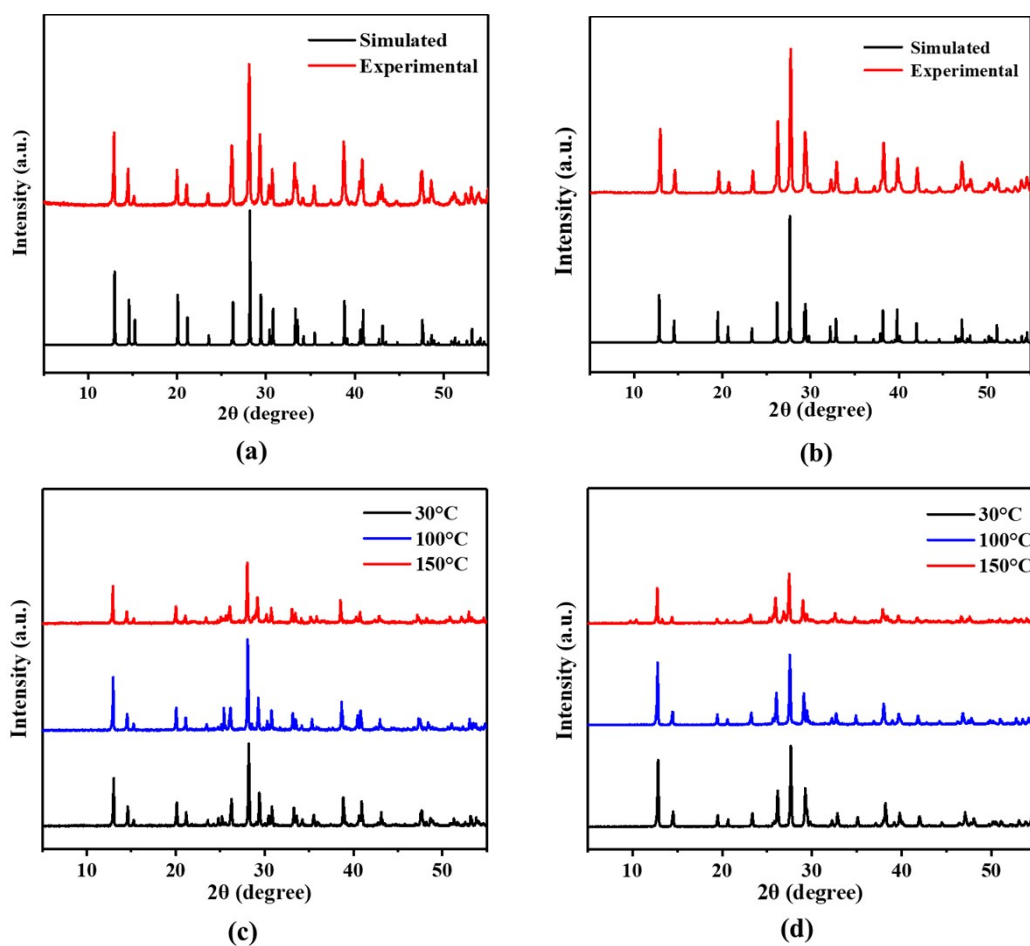

**Figure S2.** Experimental and simulated PXR D patterns of (a)  $\text{K}_2[\text{PbI}_2(\text{HCOO})_2]$  and (b)  $\text{Rb}_2[\text{PbI}_2(\text{HCOO})_2]$ . Variable-temperature PXR D patterns of (c)  $\text{K}_2[\text{PbI}_2(\text{HCOO})_2]$  and (d)  $\text{Rb}_2[\text{PbI}_2(\text{HCOO})_2]$ .

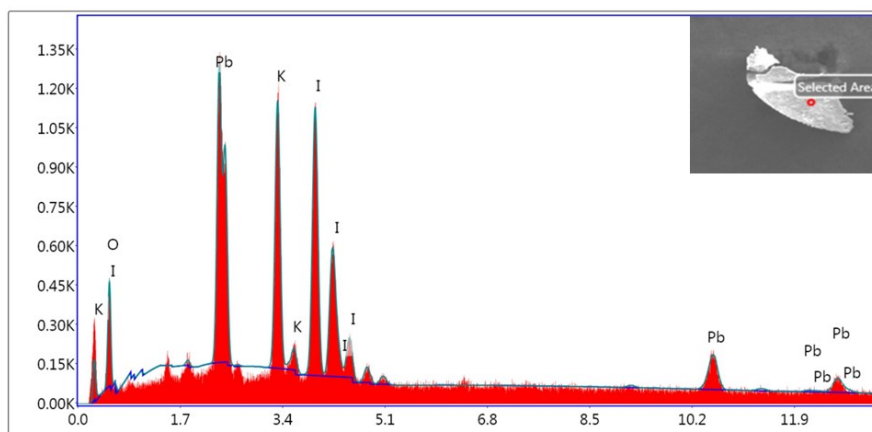

(a)

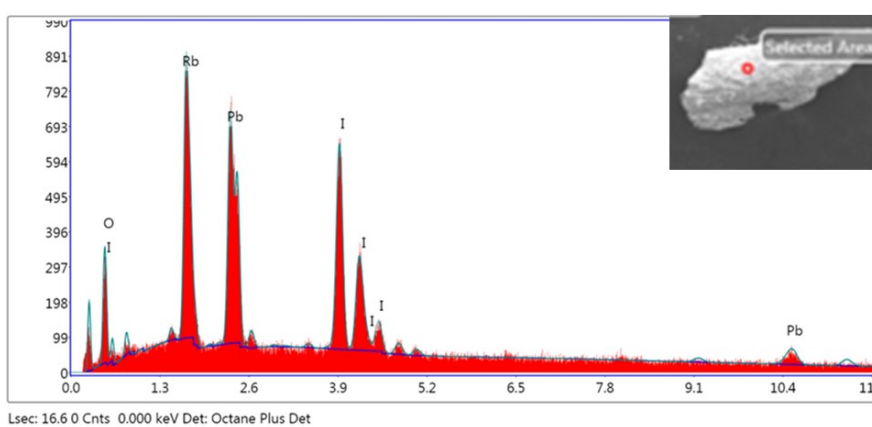

(b)

**Figure S3.** EDS spectra of (a)  $K_2[PbI_2(HCOO)_2]$  and (b)  $Rb_2[PbI_2(HCOO)_2]$ .

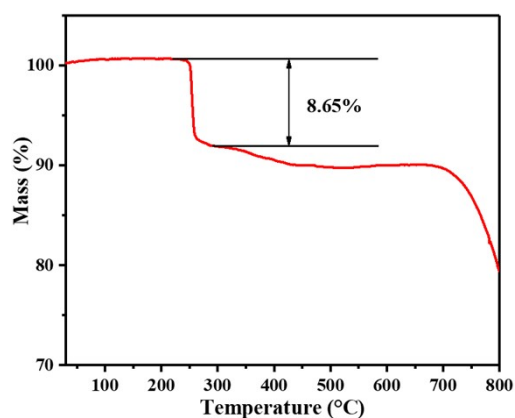

(a)

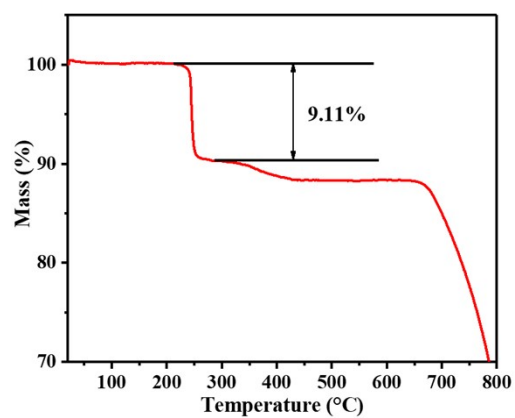

(b)

**Figure S4.** TG curves of (a)  $K_2[PbI_2(HCOO)_2]$  and (b)  $Rb_2[PbI_2(HCOO)_2]$ .

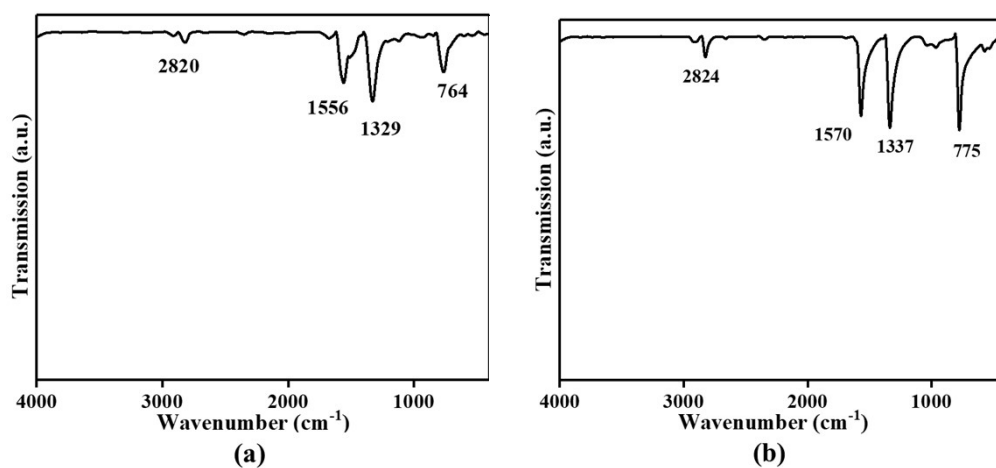

Figure S5. IR spectra of (a)  $K_2[PbI_2(HCOO)_2]$  and (b)  $Rb_2[PbI_2(HCOO)_2]$ .

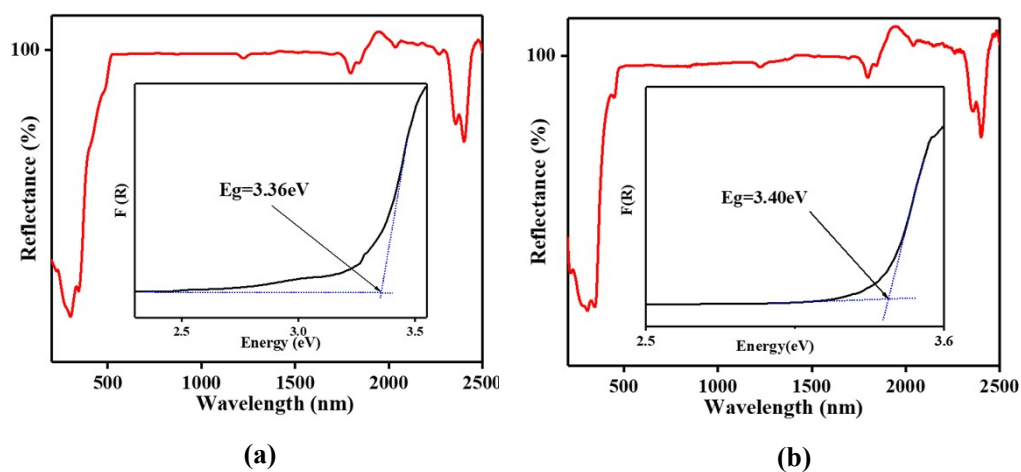

Figure S6. UV-Vis-NIR spectra of (a)  $K_2[PbI_2(HCOO)_2]$  and (b)  $Rb_2[PbI_2(HCOO)_2]$ .

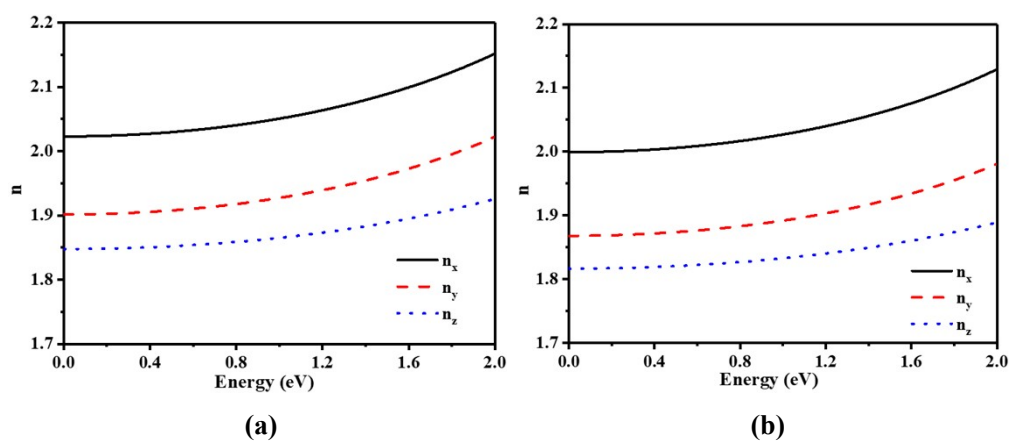

Figure S7. Optical refractive indices along principal axes of (a)  $K_2[PbI_2(HCOO)_2]$  and (b)  $Rb_2[PbI_2(HCOO)_2]$ .

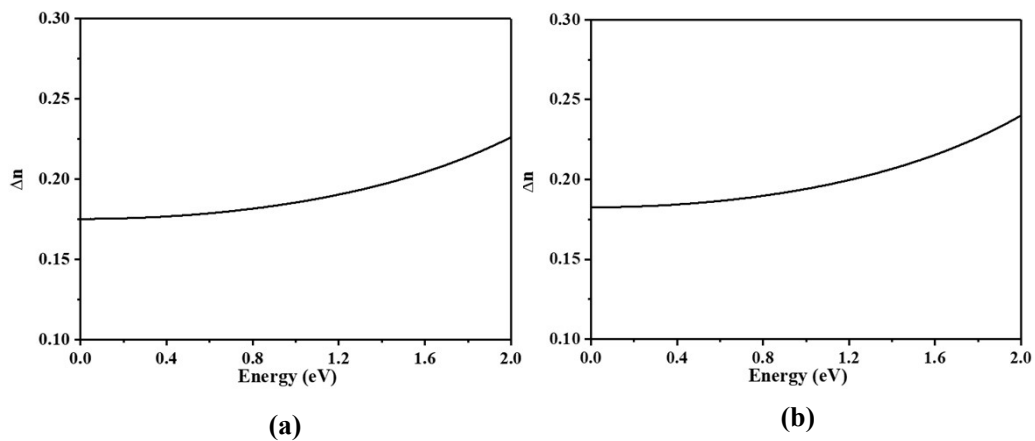

**Figure S8.** Optical birefringences  $\Delta n$  of (a)  $\text{K}_2[\text{PbI}_2(\text{HCOO})_2]$  and (b)  $\text{Rb}_2[\text{PbI}_2(\text{HCOO})_2]$  versus photon energy.

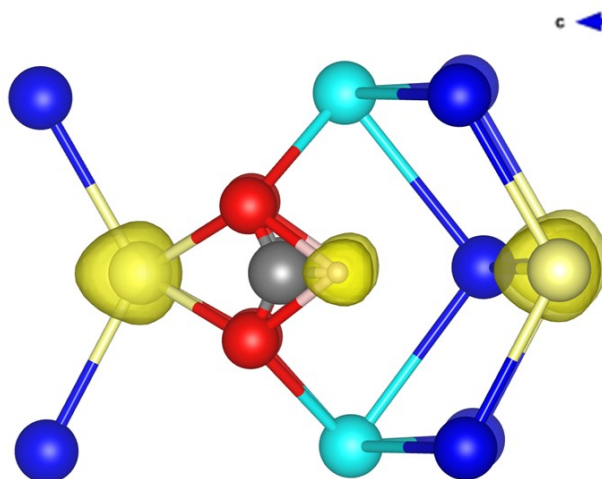

**Figure S9.** The ELF plot with an isovalue of 0.95. The beige lobes reflect the distribution of delocalized electrons. The Pb, K, I, C, H and O atoms are denoted by yellow, cyan, blue, gray, pink and red balls, respectively.

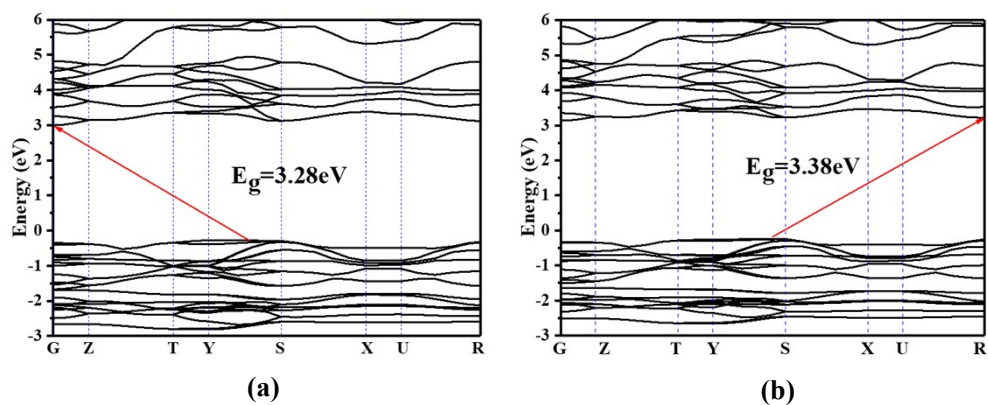

**Figure S10.** The calculated band structures of (a)  $\text{K}_2[\text{PbI}_2(\text{HCOO})_2]$  and (b)  $\text{Rb}_2[\text{PbI}_2(\text{HCOO})_2]$ .



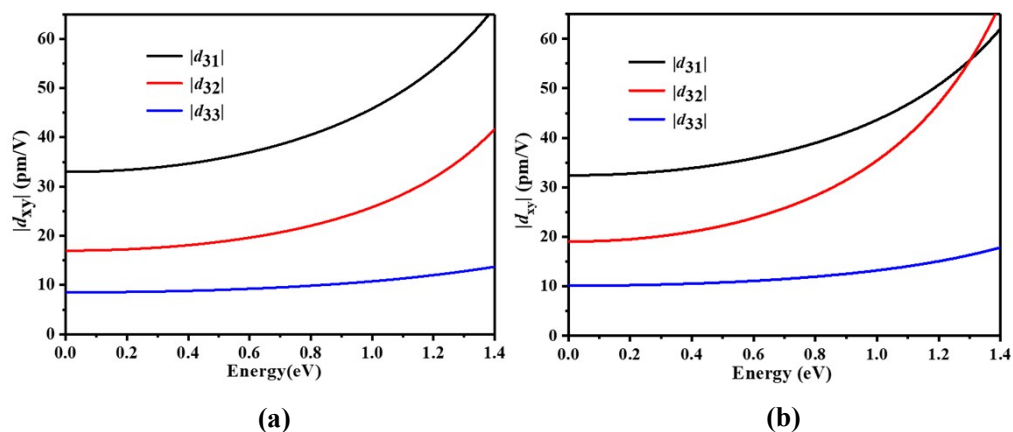

**Figure S11.** Frequency-dependent SHG coefficients of (a)  $K_2[PbI_2(HCOO)_2]$  and (b)  $Rb_2[PbI_2(HCOO)_2]$

## References

- [1] P. Sagayaraj, S. Selvakumar, *Journal of Materials Science: Mater. Elect.* 2008, **20**, 299-302.
- [2] M. S. Kajamuhideen, K. Sethuraman, K. Ramamurthi, P. Ramasamy, *Opt. Laser Technol.* 2017, **91**, 159-165.
- [3] R. Hanumantha Rao, S. Kalainathan, *Materials Research Bulletin* 2012, **47**, 987-992.
- [4] C. Ravikumar, I. H. Joe, V. S. Jayakumar, V. K. Vaidyan, V. S. Jayakumar, *AIP Conf. Proc.*, 2008, pp. 92-94.
- [5] D. Joseph Daniel, P. Ramasamy, *Opt. Mater.* 2014, **36**, 971-976.
- [6] C. Justin Raj, S. Jerome Das, *J. Cryst. Growth* 2007, **304**, 191-195.
- [7] S. Muthupoongodi, S. Theodore David Manickam, C. K. Mahadevan, J. Angel Mary Greena, S. Balakumar, X. Sahaya Shajan, *J. Cryst. Growth* 2015, **428**, 46-53.
- [8] U. Deserno, S. Haussühl, *IEEE J. Quantum Elect.* 1973, **8**, 608-609.
- [9] P. S. B. Haussühl, *Appl. Phys. A* 1977.
- [10] P. Krishnan, K. Gayathri, G. Anbalagan, 2013, pp. 906-907.
- [11] L. Bohatý, L. Bayarjargal, P. Becker, *Appl. Phys. B* 2006, **86**, 523-527.
- [12] P. Peksa, J. K. Zareba, M. Ptak, M. Maczka, A. Gagor, S. Pawlus, A. Sieradzki, *J. Phys. Chem. C* 2020, **124**, 18714-18723.
- [13] L. C. Gomez-Aguirre, B. Pato-Doldan, A. Stroppa, S. Yanez-Vilar, L. Bayarjargal, B. Winkler, S. Castro-Garcia, J. Mira, M. Sanchez-Andujar, M. A. Senaris-Rodriguez, *Inorg. Chem.* 2015, **54**, 2109-2116.
- [14] Z. Q. Zhou, R. B. Fu, Q. R. Shui, H. X. Tang, W. X. Bao, Z. J. Ma, X. T. Wu, *Inorg. Chem.* 2022, **61**, 1130-1135.
- [15] Z. Q. Zhou, Q. R. Shui, R. B. Fu, Y. B. Fang, Z. J. Ma, X. T. Wu, *Chem. Eur. J.* 2021, **27**, 12976-12980.
